# Supplementary material for: NOD1 deficiency promotes an imbalance of thyroid hormones and microbiota homeostasis in mice fed high fat diet
Source: PubMed Central journal article supplement (PMC7378078; doi:10.1038/s41598-020-69295-2), 2020-07-23

## **NOD1 deficiency promotes an imbalance of thyroid hormones and microbiota homeostasis in mice fed high fat diet**

<sup>1,2</sup>Silvia González-Ramos<sup>#\*</sup>, <sup>1</sup>Marta Paz-García<sup>\*</sup>, <sup>1</sup>Victoria Fernández-García<sup>\*</sup>, <sup>3</sup>Kevin J. Portune, <sup>4</sup>Emilio F. Acosta-Medina, <sup>3</sup>Yolanda Sanz, <sup>1,5</sup>Antonio Castrillo, <sup>1,2,5</sup>Paloma Martín-Sanz, <sup>1</sup>Maria Jesus Obregon, and <sup>1,2,5</sup>Lisardo Boscá<sup>#</sup>

<sup>1</sup>Instituto de Investigaciones Biomédicas Alberto Sols (CSIC-UAM), Arturo Duperier 4, 28029 Madrid, Spain.

<sup>2</sup>Centro de Investigación Biomédica en Red de Enfermedades Cardiovasculares (CIBERCV), y Hepáticas y Digestivas (CIBEREHD), ISCIII; Spain.

<sup>3</sup>Microbial Ecology, Nutrition & Health Research Unit, Institute of Agrochemistry and Food Technology, National Research Council (IATA-CSIC), Valencia, Spain.

<sup>4</sup>Center for Genetic Engineering and Biotechnology, Havana, Cuba.

<sup>5</sup>Unidad Asociada de Biomedicina. Instituto de Investigaciones Biomédicas Alberto Sols (CSIC-UAM) and Universidad de Las Palmas, Gran Canaria, Spain

## Supporting Information

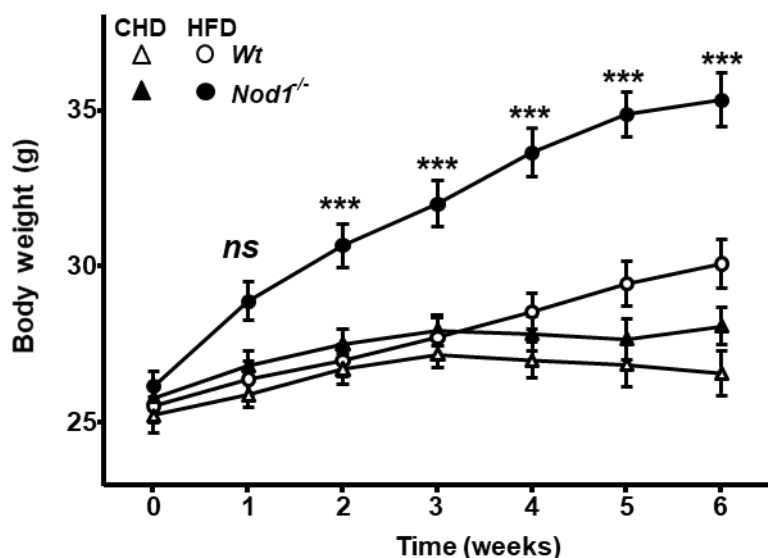

b.

| Tissue (mg) | CHD        |                     | HFD        |                     |
|-------------|------------|---------------------|------------|---------------------|
|             | Wt         | Nod1 <sup>-/-</sup> | Wt         | Nod1 <sup>-/-</sup> |
| BAT         | 118 ± 10   | 134 ± 13            | 139 ± 5    | 173 ± 6 ***         |
| eWAT        | 420 ± 50   | 602 ± 93            | 544 ± 52   | 1165 ± 114 ***      |
| iWAT        | 310 ± 34   | 394 ± 39            | 434 ± 44   | 919 ± 137 *         |
| Liver       | 1266 ± 49  | 1100 ± 29           | 1477 ± 50  | 1752 ± 89           |
| Tibia       | 21.7 ± 0.2 | 21.5 ± 0.2          | 21.7 ± 0.1 | 21.1 ± 0.1          |

**Figure S1. Changes in body weight of WT and NOD1 KO mice under CHD or fed HFD.** The data show the weights of 15 mice per condition (a.) and the tissue weight at week 6 of follow-up, expressed as mg of tissue per animal (b.). Results show the mean ± S.E.M. per nutritional condition and genetic background. \* $P < 0.05$ ; \*\*\* $P < 0.005$  vs. the corresponding condition in WT mice. *ns*, not statistically significant.

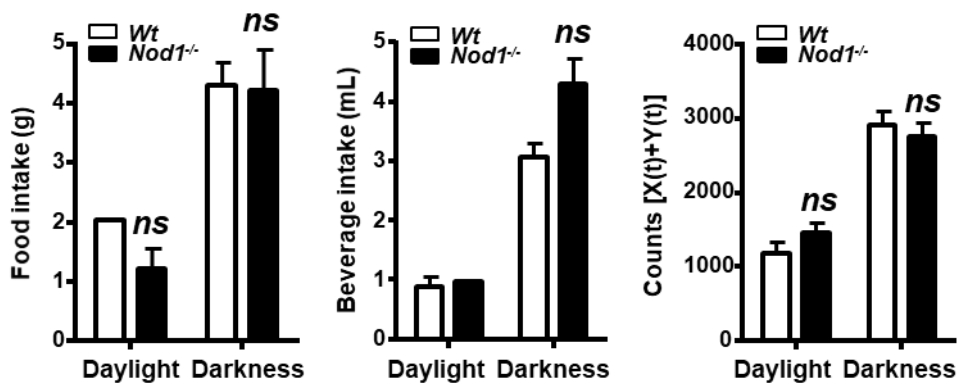

### HFD

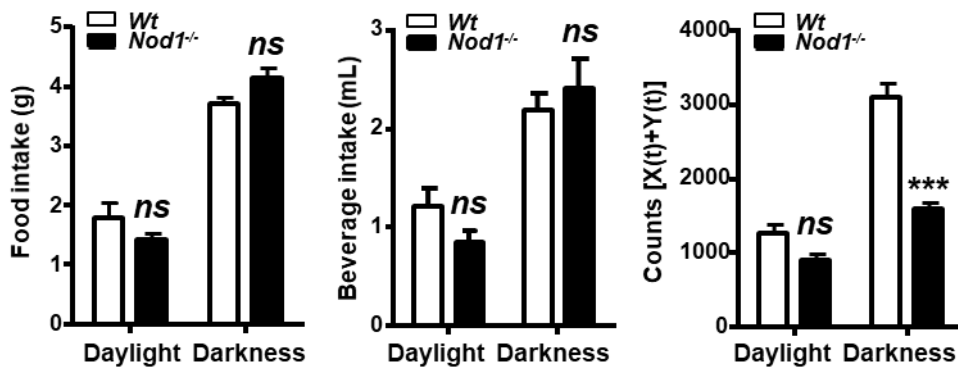

**Figure S2. Evaluation of animal parameters after CHD or HFD in metabolic cages.**

Animals were fed under the indicated regimes and the food and beverage intake, and the movement were recorded in periods of 12h. Results show the mean±S.E.M. of 6 animals per nutritional condition and genetic background. \*\*\* $P < 0.005$  vs. the corresponding condition in WT mice. *ns*, not statistically significant.

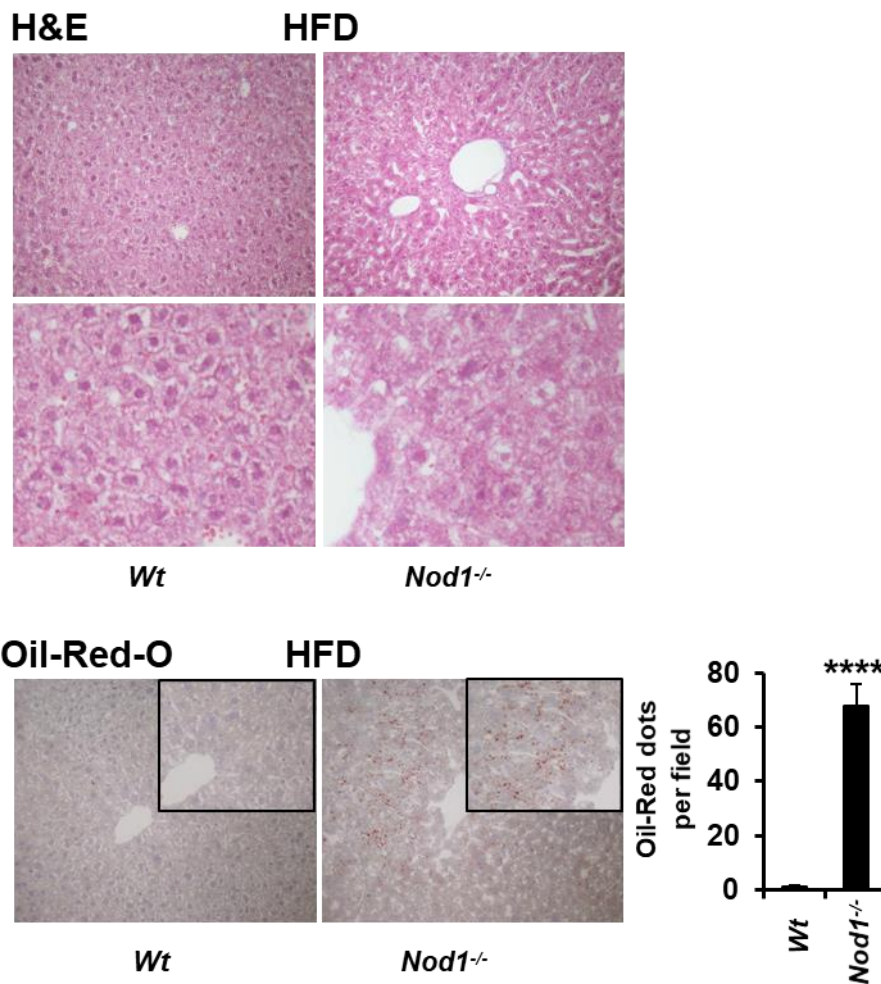

**Figure S3. Recovery of WT and NOD1 KO mice after HFD.** Animals (n=4 for each condition) were fed for 4 weeks HFD. After feeding for two additional weeks with CHD, samples of liver were analyzed by eosin and hematoxylin staining or with Oil-red O staining to evaluate lipid accumulation. The number of oil red 'dots' per field was quantified. Results show a representative histochemistry and the mean±S.E.M. of the red dots in at least four equivalent fields. \*\*\*\* $P < 0.001$  vs. the corresponding condition in the dietary reversed WT mice.

**Figure S4.**

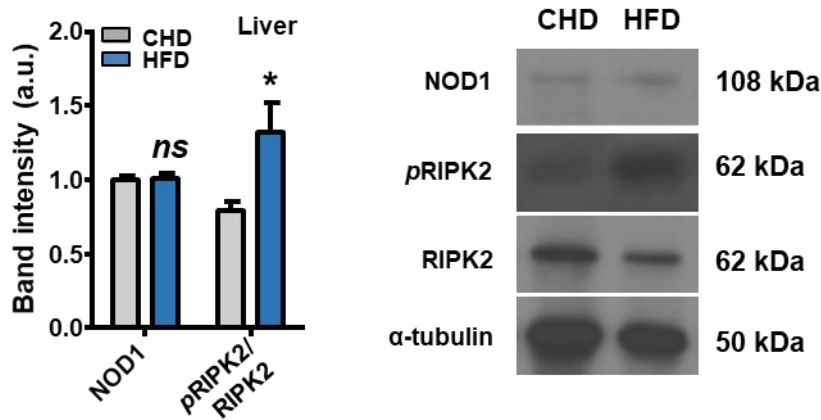

**Figure S4. HFD activates NOD1 in WT mice.** Animals were fed HFD for 6 weeks and the levels of liver NOD1, phospho-RIPK2 and RIPK2 were determined by immunoblot. Results show a representative blot and the mean $\pm$ S.E.M. from 6 animals. \* $P$ <0.05 vs. the corresponding condition in CHD. *ns*, not statistically significant.

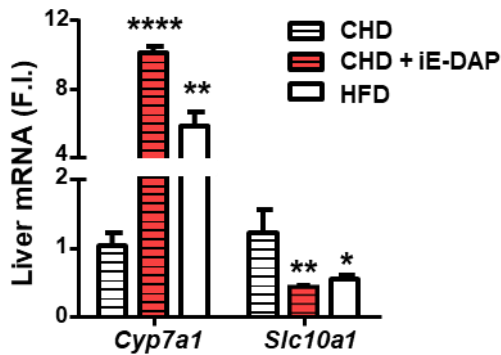

**Figure S5. NOD1 activation under CHD promotes changes in hepatic bile acid metabolism markers similar to those achieved under HFD.** Animals were fed CHD and administered for 24h the NOD1 activator iE-DAP, or fed HFD for 6 weeks. The hepatic mRNA levels of *Cyp7a1* and *Slc10a1* were determined. Results show the mean $\pm$ S.E.M. of 6 animals. \* $P$ <0.05, \*\* $P$ <0.01, \*\*\*\* $P$ <0.001 vs. the CHD condition.

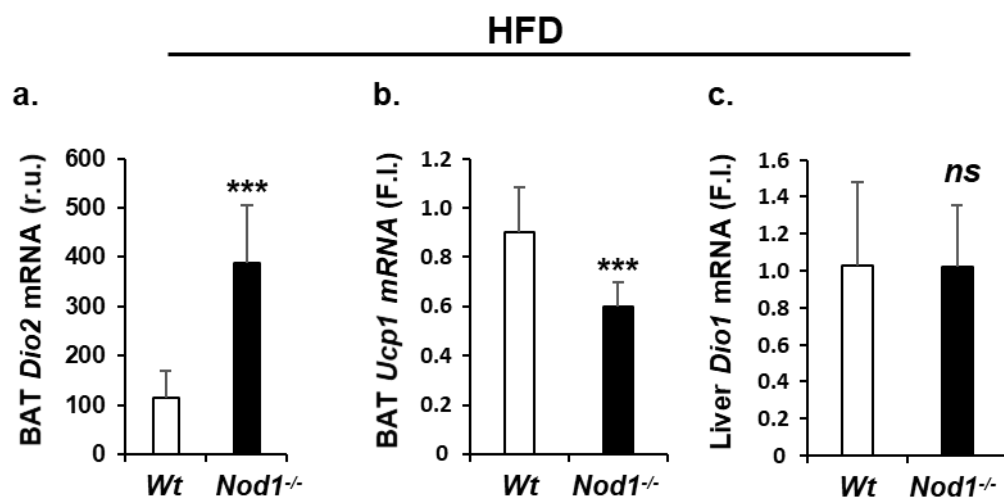

**Figure S6. mRNA levels of *Ucp1* and *Dio2* in BAT and *Dio1* in liver in WT and NOD1 deficient mice under HFD.** Animals were fed HFD for 6 weeks and the levels of the corresponding genes were determined using specific Taqman probes (**a.-c.**). Results show the mean±S.E.M. of 6 animals. \*\*\* $P < 0.005$  vs. the WT condition. *ns*, not statistically significant.

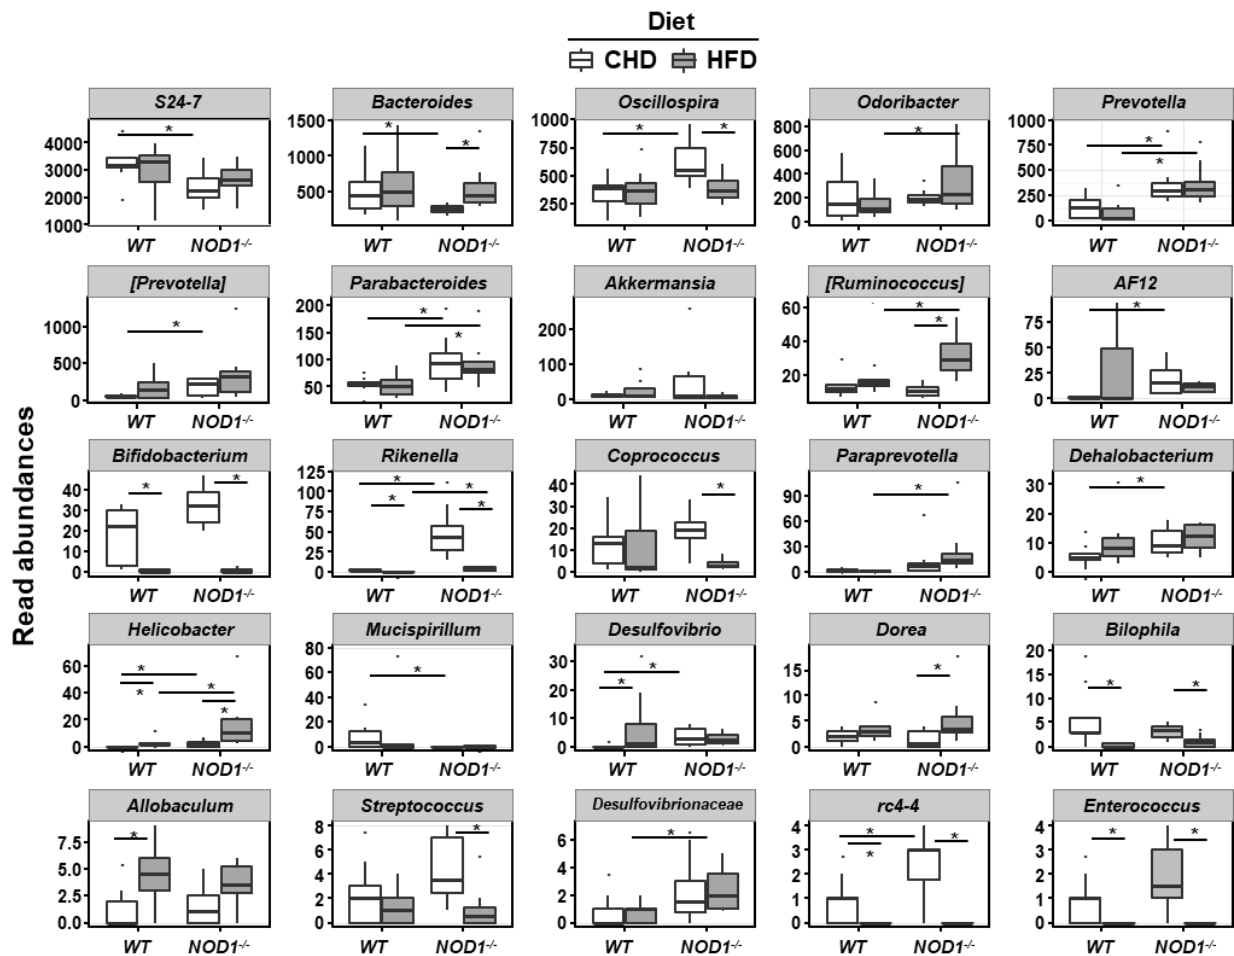

**Figure S7. Microbiota taxonomic abundances.** Boxplots of gut microbiota taxonomic groups (family and genera) in which at least one significant difference was detected between treatment groups. Significant differences ( $P < 0.05$ ) between respective treatment groups are indicated with a bar and an asterisk (\*).

**Figure 3c**

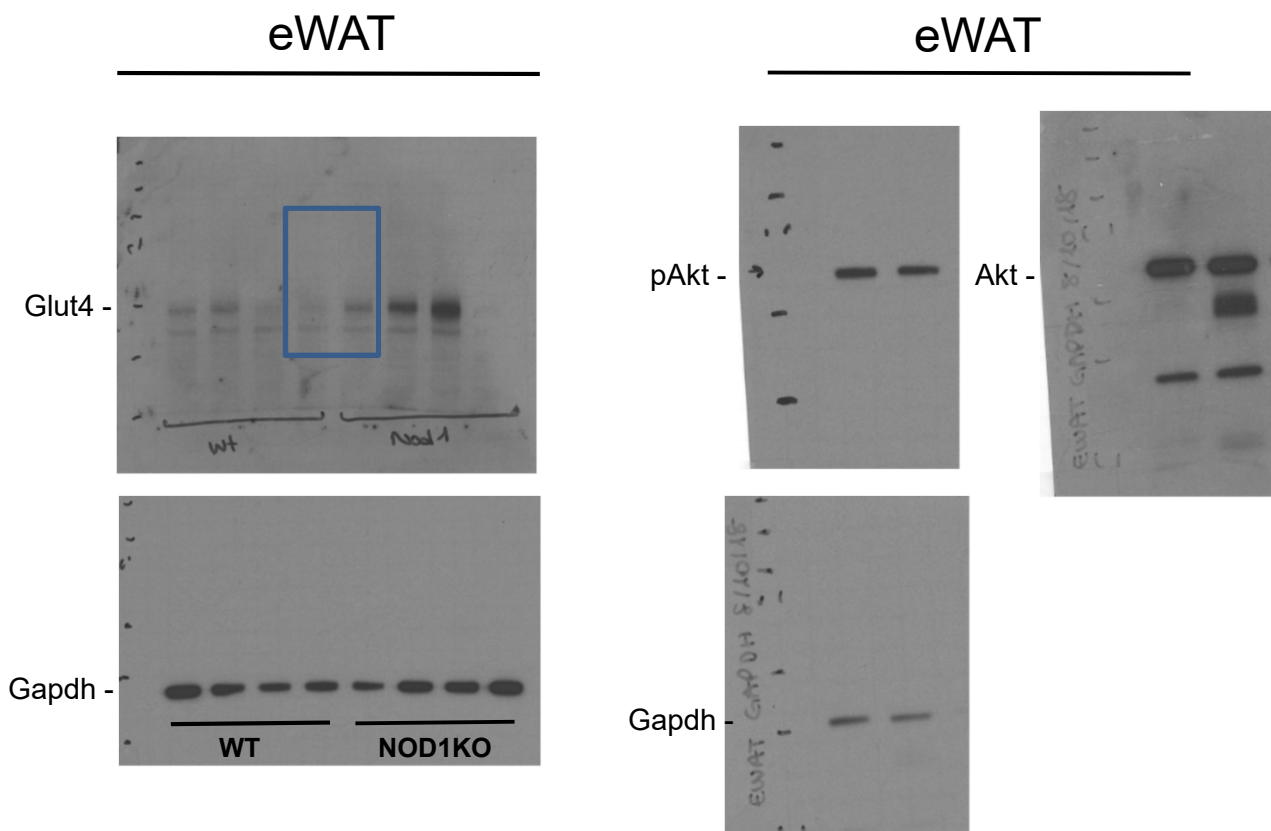



**Figure 4a**

**HFD (6 weeks)**

**WT**

**NOD1KO**

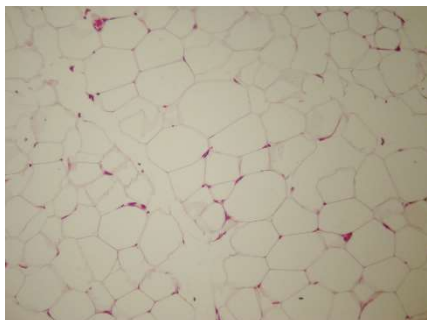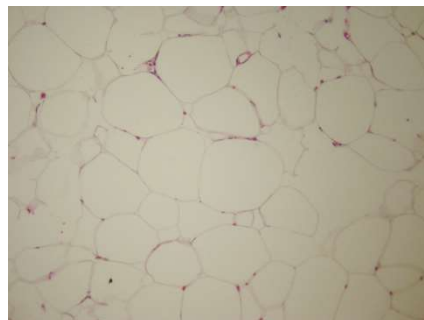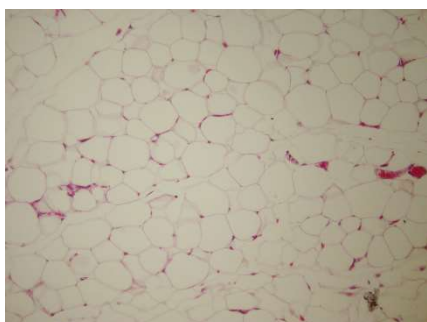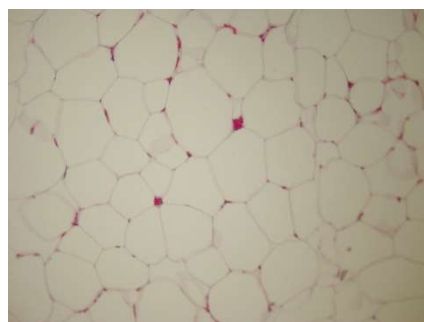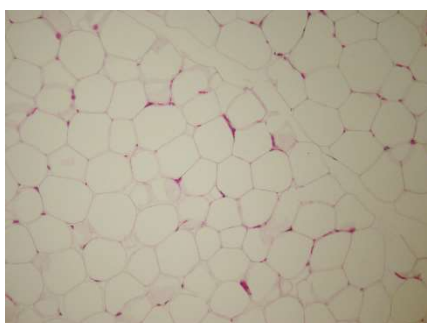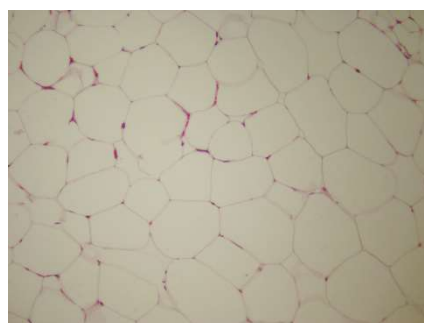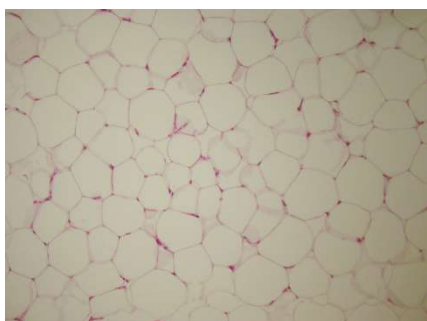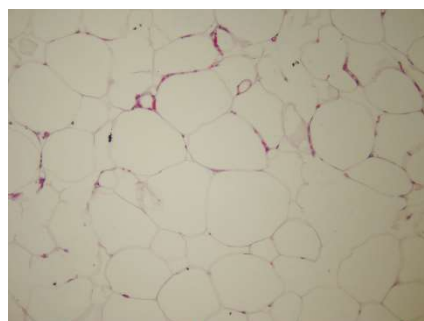

**Figure 4d**

**HFD (6 weeks)**

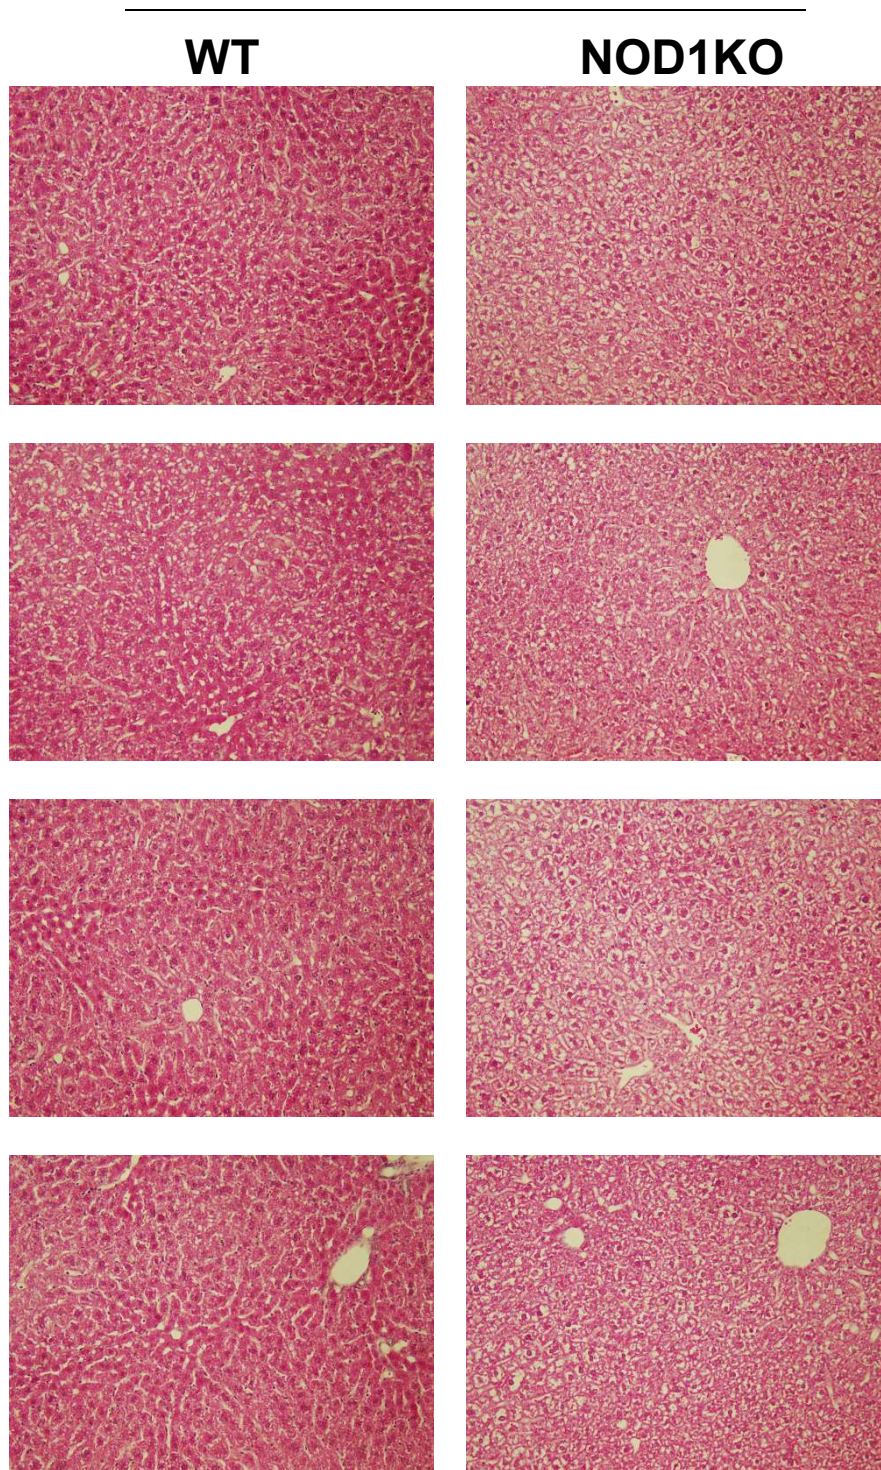

# Suppl. Figure S3

Reversion:  
4 weeks HFD → 2 weeks CHD

WT

NOD1KO

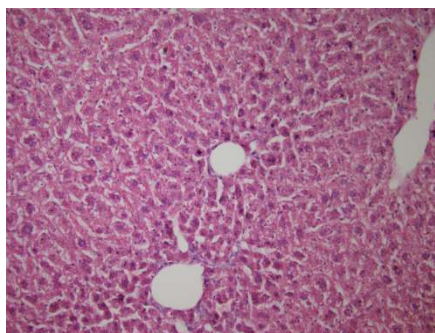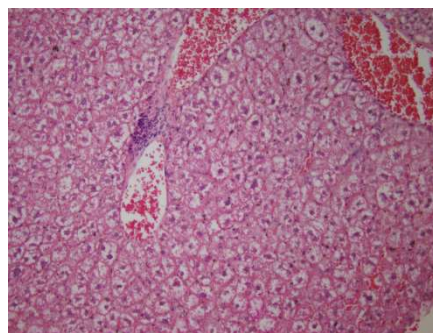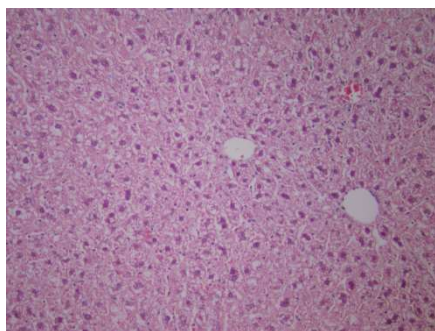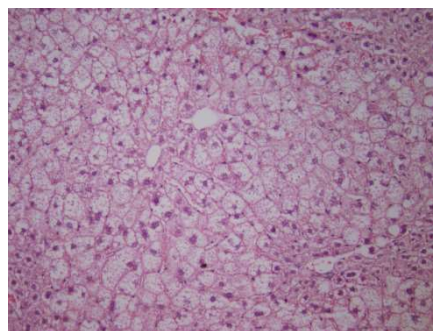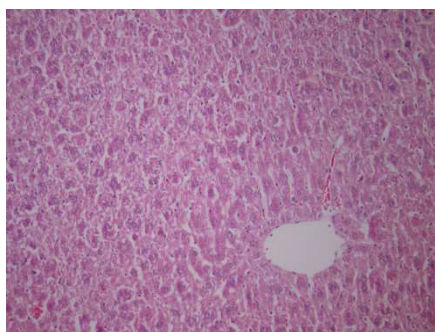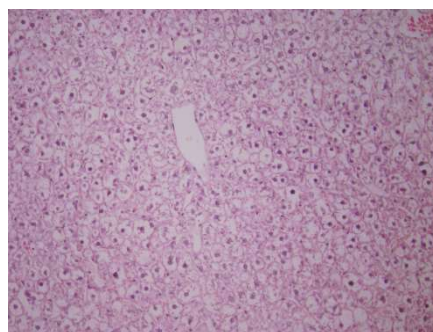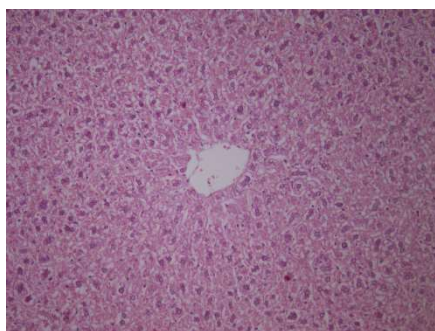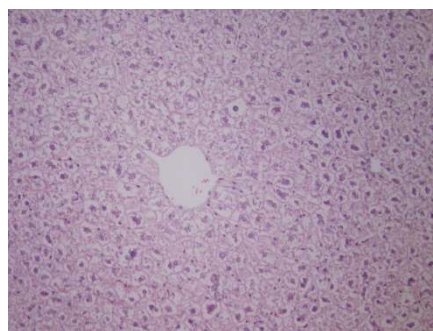

# Suppl. Figure S4

## Liver

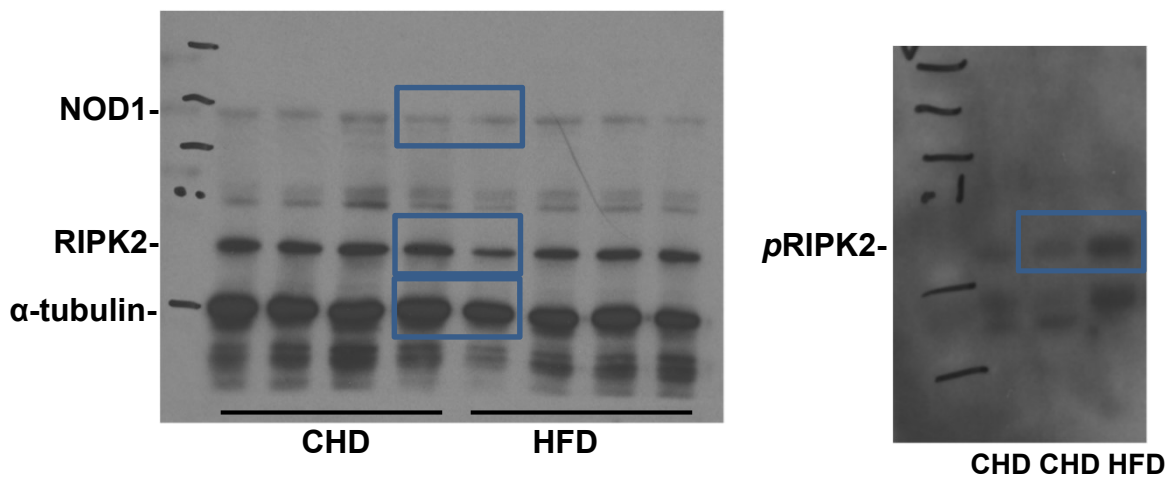

Supplement: 41598_2020_69295_MOESM1_ESM.pdf [file 41598_2020_69295_MOESM1_ESM.pdf]
